# Supplementary material for: Incorporation of straw from maize and early rice differentiated sequestration and stability of soil organic carbon---A field incubation of 13C-labelled straw under maize -rice and double rice cropping
Source: Research Square preprint supplement (doi:10.21203/rs.3.rs-5808381/v1), 2025-01-15
Supplement: Supplementary file 1 [file 20c1ecd69fa15df4b3068e1d.docx]

Table S1 C concentration, mass proportion of intra-microaggregate particulate organic carbon (iPOC) and the mineral-associated organic carbon (MAOC) in bulk soil at different sampling times.

| Sampling days (d) | Treatments | C concentration | |  | Mass proportion in bulk soil | |  |
| --- | --- | --- | --- | --- | --- | --- | --- |
| (g C kg-1 fraction) | | (%) | |
|  |  | iPOC | MAOC |  | iPOC | MAOC |  |
| 81 | MR-SM | 13.17±0.75 ab | 12.56±0.56 a |  | 68.55±1.01 b | 15.20±1.73 g |  |
| RR-ER | 14.25±1.27 a | 12.01±0.28 ab |  | 66.81±1.14 bc | 16.43±0.87 fg |  |
|  |  |  |  |  |  |  |  |
| 340 | MR-SM | 12.24±0.49 bcd | 11.37±0.34 bc |  | 63.43±2.60 cde | 19.62±1.84 de |  |
| RR-ER | 12.60±0.43 bc | 11.49±1.01 bc |  | 63.18±2.19 de | 20.19±2.18 de |  |
|  |  |  |  |  |  |  |  |
| 448 | MR-SM | 12.01±0.45 cde | 11.25±0.25 bc |  | 64.58±0.96 cde | 21.72±0.87 cd |  |
| RR-ER | 11.76±0.27 cde | 11.30±0.28 bc |  | 62.10±1.56 e | 27.76±2.17 a |  |
|  |  |  |  |  |  |  |  |
| 709 | MR-SM | 10.92±0.32 ef | 10.61±0.24 cd |  | 66.16±1.48 bcd | 21.17±1.81 de |  |
| RR-ER | 11.27±0.25 def | 11.09±0.65 cd |  | 65.89±2.64 bcd | 26.01±1.99 ab |  |
|  |  |  |  |  |  |  |  |
| 816 | MR-SM | 10.26±0.15 f | 10.30±0.18 d |  | 74.23±2.08 a | 18.33±1.30 ef |  |
| RR-ER | 10.61±0.11 f | 10.25±0.34 d |  | 68.70±1.51 b | 24.40±0.44 bc |  |
| Incubation time (T) | | ** | ** |  | ** | ** |  |
| Cropping system (C) | | ns | ns |  | * | ** |  |
| T**×C** | | ns | ns |  | ns | ns |  |

MR-SM, the incubation tube with 13C-enriched spring maize straw; RR-ER, the incubation tube with 13C-enriched early rice straw. Different lowercase letters for the same item mean significant variations among sampling time and straw types (*p*< 0.05).


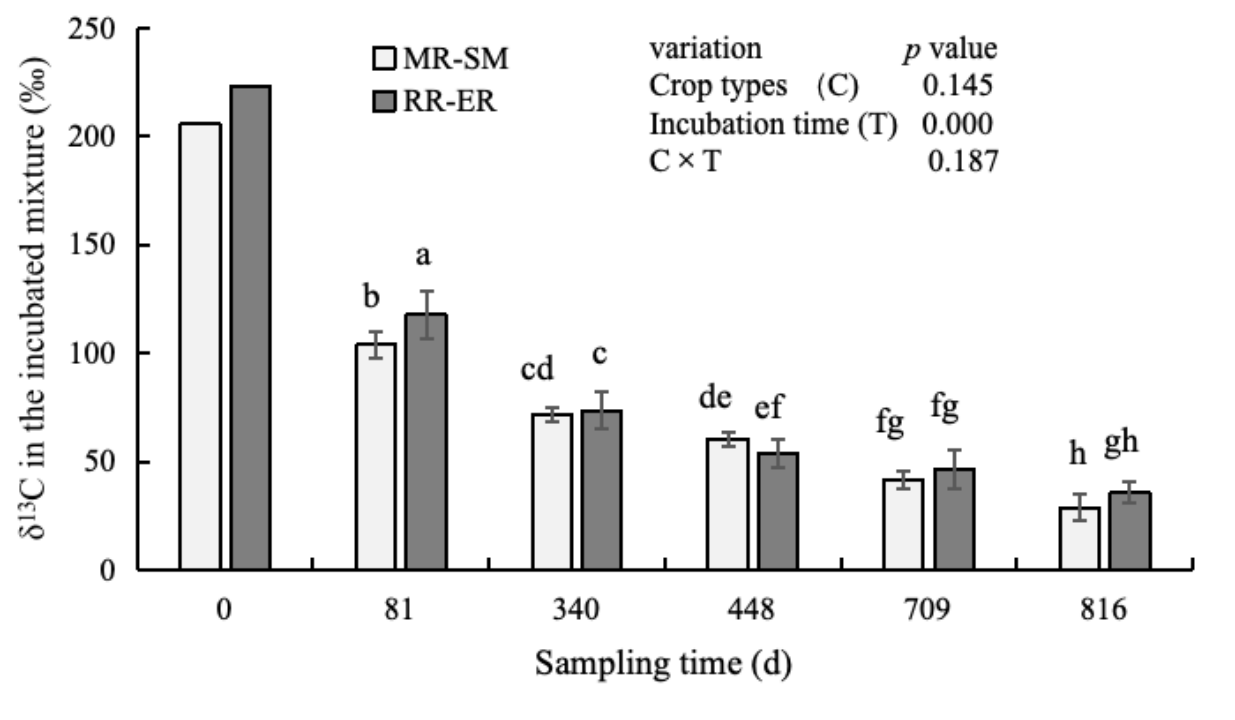


Fig. S1 Changes in δ13C value of the incubated mixture in buried tubes at different sampling days. MR-SM, the incubation tube with 13C-enriched spring maize straw; RR-ER, the incubation tube with 13C-enriched early rice straw. Different lowercase letters above the column mean significant variations for MR-SM and RR-ER treatments among sampling time (*p*< 0.05). ns, no significant difference (*p* > 0.05); * and ** represent significant differences at p<0.05 and p<0.01.
